# Supplementary material for: PDEAEMA-based pH-sensitive amphiphilic pentablock copolymers for controlled anticancer drug delivery
Source: Royal Society of Chemistry journal article supplement (doi:10.1039/c6ra10757e), 2016-01-01
Supplement: c6ra10757e1.pdf [file c6ra10757e1.pdf]

## Supporting Information

### PDEAEMA-based pH-sensitive amphiphilic pentablock copolymers for controlled anticancer drug delivery

Quan Chen,<sup>a</sup> Wenjing Lin,<sup>a</sup> Haiying Wang,<sup>b</sup> Jufang Wang,<sup>b</sup> Lijuan Zhang<sup>a,\*</sup>

<sup>a</sup> School of Chemistry and Chemical Engineering, South China University of Technology, Guangzhou 510640, P R China

<sup>b</sup> School of Bioscience & Bioengineering, South China University of Technology, Guangzhou 510640, P R China

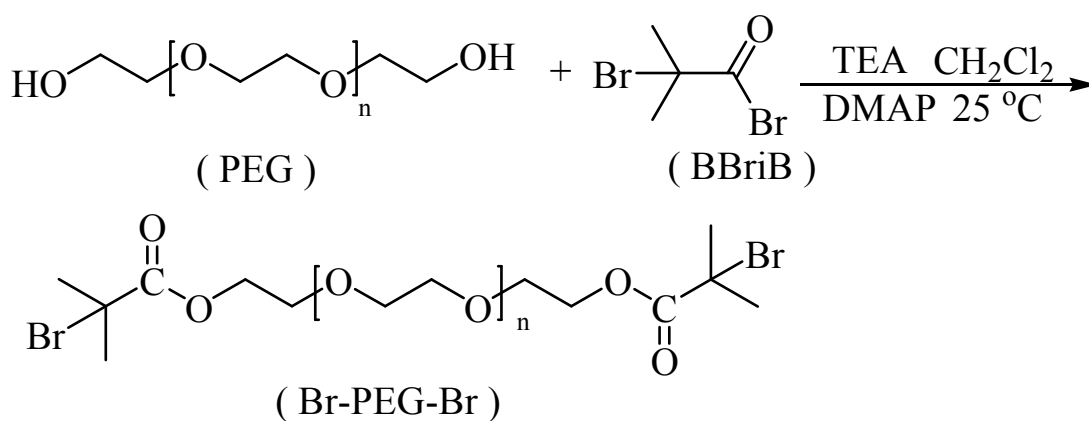

**Scheme S1** The synthetic route of macroinitiator Br-PEG-Br.

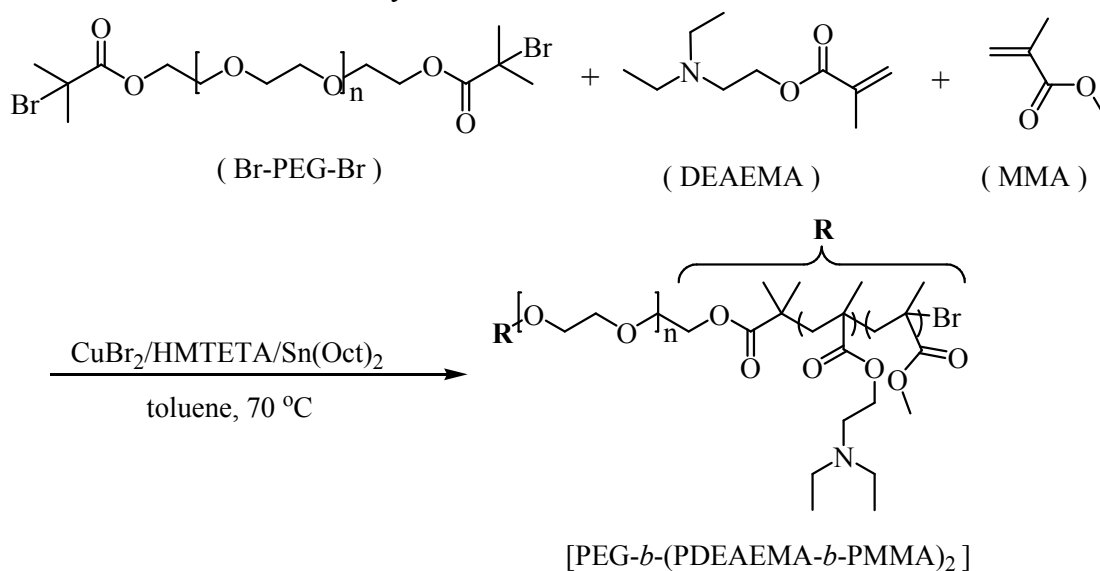

**Scheme S2** The synthetic route of PEG-*b*-(PDEAEMA-*b*-PMMA)<sub>2</sub>.

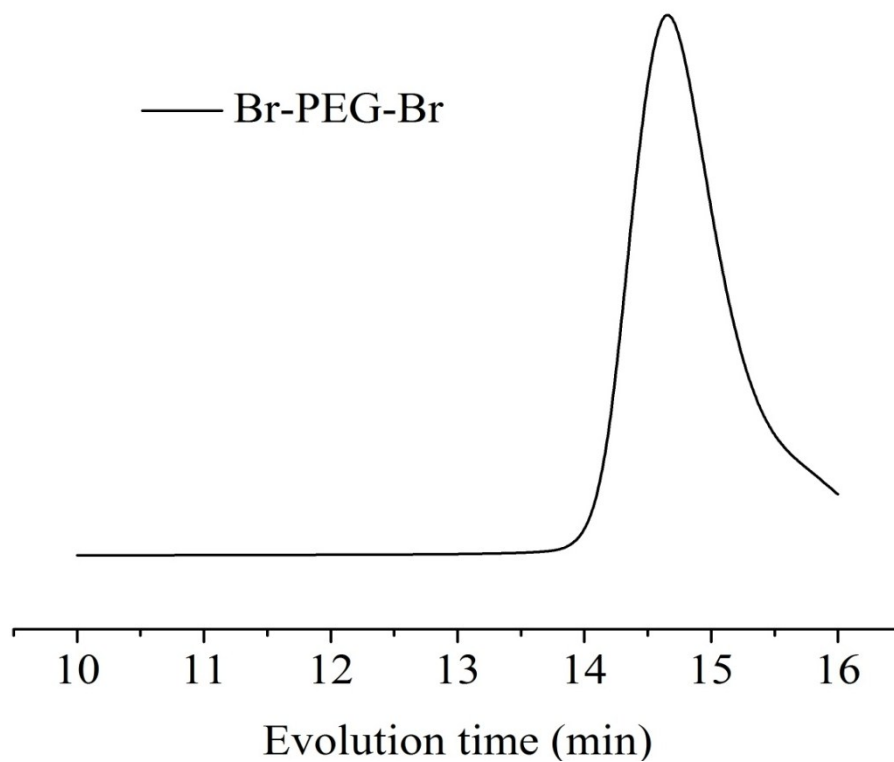

Fig. S1. GPC traces of macroinitiator Br-PEG-Br

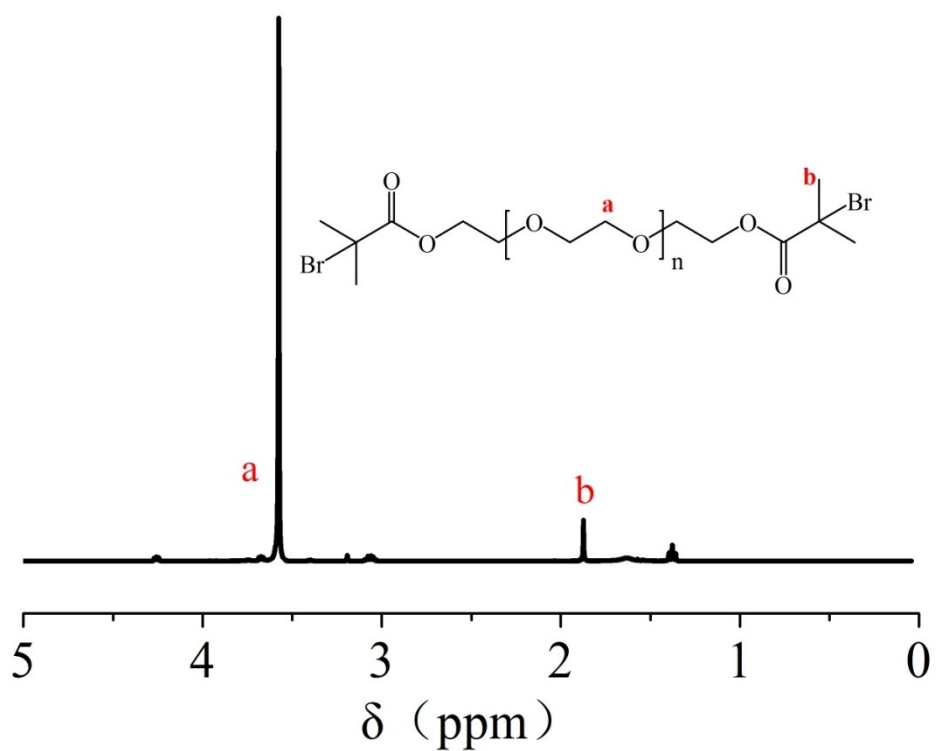

Fig. S2.  $^1\text{H}$  NMR spectra of macroinitiator Br-PEG-Br

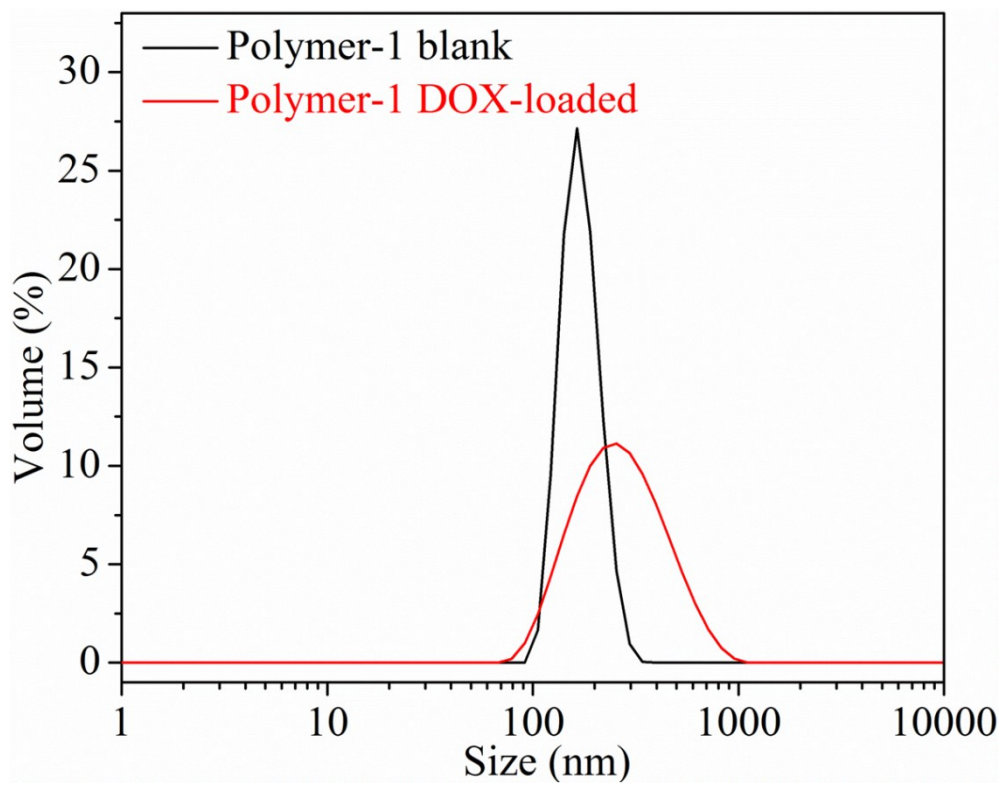

**Fig. S3.** Size distribution of Polymer-1 blank and DOX-loaded micelles
